# Supplementary material
Source: publisher figshare collection journal article supplement (https://gsajournals.figshare.com/articles/dataset/_/14604807)
Supplement: Supplementary file 1 [file 1]

## Sheet: PC_Composition
		p1p2												p2												N2												mn
	Composition (mol%)	15°C				20°C				25°C				15°C				20°C				25°C				15°C				20°C				25°C				15°C				20°C				25°C
	PC 15:0/18:1	4.39638	4.43094	4.41833	4.71205	4.70829	4.52648	4.98302	4.68521	4.79471	5.06409	4.50533	5.09896	2.54583			4.52678	3.23785	1.09335	3.093	3.57581	3.56352	2.63057	3.51836	3.17333			2.53839	2.36661	3.10557	3.34299	2.81245	3.35401	3.47121	3.46427	3.46961	3.47229	1.65108		1.41371		1.71491	1.796	1.43533		1.28935	1.32867		1.50743
	PC 16:1/17:1	0.781433	0.698865	0.633026	0.673344	0.687403	0.780603	0.7268	0.688219	0.672771	0.626137	0.682109	0.701697	0.68457				0.98762	1.77537	1.06462	0.703173	0.922974	0.736168	0.964632	1.13373	1.50694	1.01085	0.845667	0.719509	1.11109	0.80799	0.997805	1.1102	1.28697	0.718481	0.871663	0.738577	0.638467		0.433567	0.757105	0.426785	0.467839	0.537987	0.354525	0.415459	0.37422		0.370454
	PC 17:0/17:0	0.819298	0.848471	0.707696	0.912828	0.790945	0.749491	0.919862	0.789808	1.0135	0.925768	0.888252	0.784909	0.175388	0.893285	0.272674	0.621773	0.711685	0.914787	0.242192	0.175383	0.291812	0.305726	0.36553	0.281672	0.155275		0.156086	0.130104	0.239123	0.0777286	0.0912446	0.0816739	0.383155	0.456052	0.33698	0.413782	0.376792	0.256924	0.169166	0.309279		0.471182		0.176041	0.150294	0.17347		0.155545
	PC 16:0/18:1	1.98942	1.89192	1.92906	1.73412	2.37015	2.19282	2.01328	2.36451	2.5217	2.33734	2.63592	2.33839	1.57321		3.16125	2.40277	2.38769	18.3651	2.39279	1.94839	3.32071	3.08144	3.14606	3.11543			1.98614	2.2897	2.58355	3.00413	2.43881	2.64249	2.48473	2.90513	2.83919	3.04343	1.19155		1.22588	1.16566	1.43391	1.54087	0.871455		1.33483	1.4574	1.76415	1.32397
	PC 16:0/18:2	0.747107	0.712793	0.676045	0.591429	0.707106	0.733909	0.603609	0.656598	0.75635	0.876677	0.944287	0.753026	0.795745					1.86066		0.525607	1.36769	1.57093	1.40855	1.62872			0.657424	0.672497		0.747883	0.791111	0.846878	1.35529	1.20459	1.2043		0.736723				0.930395	0.83141	0.529542		1.12299	1.2043	1.16438	1.03999
	PC 16:1/18:1	1.81496	1.78864	1.71493	1.78027	2.04824	1.99734	1.95655	1.9373	1.81673	1.81485	2.0395	1.98907	1.64743	5.30655	1.78351	2.38822	1.87957	4.72712	1.7879	1.76291	2.08789	1.81128	2.02061	1.8151		2.86968	1.69281	1.82568	2.17994	2.04709	2.14296	1.98652	1.66447	1.85872	1.61967	1.73506	1.53732		1.65185	1.87411	1.25016	1.34914	1.01278	1.32024	1.17524	1.12058	1.39541	1.0374
	PC 17:1/17:1	1.0395	1.15652	1.0816	1.14947	1.17829	1.35534	1.19228	1.23867	1.23832	1.07173	1.02158	0.990284	0.648511	1.27155	0.72395	1.17041	0.984716		0.893754	0.773646	1.03961	1.1738	1.03658	1.10435	1.47518	1.96551	0.59459	0.732584	1.02456	0.859316	0.986252	0.884976	0.765231	0.955523	0.739274	0.757106	0.692128	0.897087	0.545374	0.698909	0.446081	0.722828	0.4658	0.945594	0.605587	0.676148	0.835294	0.627486
	PC 16:0/18:3	0.74803	0.635488	0.735616	0.513909	0.719266	0.647366	0.588515	0.601382	0.585404	0.704803	0.690571	0.619496	0.46451			1.52876	0.863584		0.824445	0.838299	0.809616	0.737099	0.850868	0.951181			0.721542	0.570085	1.2964	0.899428	0.779724	1.20931	0.605004	0.679084	0.613741	0.830668	0.450205	2.15231		0.729246	0.666166	0.489173	0.413101	0.597914	0.447733	0.413477	0.537265	0.42973
	PC 17:0/18:1	4.24242	4.68524	4.22576	4.63957	4.267	4.4173	4.94754	4.5934	5.19471	5.4398	4.87021	5.46023	2.66843	1.67926			2.69218		2.50061	2.83755	3.0536	2.98947	2.84024	3.00109			1.95454	2.09426	1.69327	1.9063	2.0998	2.02148	2.97598	3.45448	3.01602	3.04099	1.73095		2.05753		2.42	2.49901	1.86389	3.16365	2.05304	2.03108	2.75457	2.43519
	PC 17:0/18:2	1.40886	1.40485	1.38386	1.43979	1.17967	1.42241	1.35506	1.3177	1.56813	1.55809	1.62422	1.58027	0.921977		1.25195	1.69401	1.27126		0.75993	0.765409	1.47083	1.41091	1.64731	1.42626		0.857646	0.520823	0.459775	0.681602	0.467242	0.61391	0.641631	1.33545	1.29067	1.36565	1.35268	0.860739		0.662081	1.09862	0.869203	0.796958	0.80371	0.786046	1.398	1.41097	1.26344	1.36915
	PC 17:1/18:1	4.12656	3.86224	4.01481	3.9811	4.32722	4.16099	4.50156	4.67998	4.63078	4.37209	4.70403	4.32648	4.58477		7.94036	5.5294	6.02475		5.51857	5.01898	6.07153	6.8405	5.80883	5.90185	8.23823		5.21117	5.65801	6.11431	5.88003	6.76997	6.00462	4.79848	4.92047	4.7454	5.3206	3.65482	7.87234	4.56368	4.95075	4.83519	4.28332	3.90132	6.04176	4.10316	4.19621	4.97531	4.31213
	PC 17:1/18:2	1.29673	1.10998	1.29867	1.22924	1.19925	1.25083	1.20134	1.27259	1.43046	1.23646	1.38627	1.17435	1.73114		2.63493	2.43834	2.15892	5.51656	1.85769	1.756	2.62394	2.86246	2.54512	2.50587	3.48548	2.9411	1.80367	1.7217	2.0154	1.94998	1.96644	2.11851	3.257	2.36214	2.38637	2.40733	1.97306		1.96336	2.72834	2.63661	2.37731	2.41007	2.58627	4.02158	4.23168	3.85433	3.98318
	PC 17:1/18:3	1.24713	1.29746	1.1599	1.19978	1.43789	1.33097	1.26538	1.15973	1.36349	1.35829	1.18976	1.4226	1.19758	4.49261	1.91626	2.34146	2.05746	6.53115	1.334	1.81915	1.57026	1.30713	1.53901	1.35982	2.70351		1.33675	1.31175	1.89934	1.51035	1.69002	1.76275	1.34809	1.19747	1.09152	0.952762	1.35582	3.04827	1.30768	1.58422	1.55154	1.52939	1.48428	1.42339	1.28704	1.39843	1.52274	1.38473
	PC 15:0/20:5	1.98518	2.39545	1.7057	2.3197	1.87758	2.15028	2.21821	1.73332	2.17865	2.34898	1.87247	2.21372	1.2311	1.82386	1.54608	2.80719	2.22508		1.84682	1.85476	1.59289	1.55961	1.90505	1.53939	1.53283	1.95612	1.45538	1.22407	1.59251	1.37438	1.23006	2.04322	1.98082	2.16978	1.73343	1.75923	1.40215	1.34065	0.887977	1.50196	1.52592	1.35382	1.54394	1.23434	0.999861	0.982258	1.13141	1.01637
	PC 18:0/18:0	0.736631	0.459281	0.541862	0.478347	0.611829	0.483793	0.504823	0.584846	0.312158	0.34005	0.324317	0.328481	0.432726	5.93988		1.15685	0.681782	12.759	0.739158	0.624577	0.244107	0.253306	0.375666	0.355729			0.59144	0.629445	0.517329	0.46926	0.340717	0.565125	0.550903	0.263194	0.3428	0.359544	0.409619		0.364775	0.682394	0.32852		0.177748		0.145574	0.180414		0.304672
	PC 18:0/18:1	3.42815	2.48071	3.27541	2.72765	3.53523	2.97421	3.09204	3.54399	2.76039	3.11545	2.87682	2.98071	2.87806			3.7646	2.92693		2.50626	2.30069	2.46243	2.39687	1.96369	2.37591	5.54505		3.36844	4.16173	2.91684	3.40474	3.04909	2.51358	2.04834	2.20753	2.31184	2.32285	1.7262		2.33776	1.73094	1.91933	2.29787	1.59313	2.46853	1.19971	1.14873	1.68804	1.3108
	PC 17:1/19:1	0.871317	0.734411	0.760793	0.888642	0.81177	0.837179	0.905276	0.877512	0.908292	0.837256	0.786871	0.923214	0.626462	4.56901	0.950589	1.13629	0.423508		0.513257		0.700837	0.752331	0.739748	0.630476	1.54316	1.29686	0.641833	0.584647	0.771675	0.749282	0.851439	0.878928	0.86804	0.930468	0.938671	0.936018	0.536136	1.57618	0.722338	0.841024	0.635398	0.670962	0.585006	0.761483	0.4944	0.556493	0.67029	0.627132
	PC 18:1/18:1	5.30785	5.70192	5.09444	5.87712	5.78053	5.62329	5.996	5.55953	6.43425	5.91413	6.40055	6.31145	5.21202		5.49578	4.2624	5.21957	2.74666	5.78165	5.60071	6.12415	7.43877	6.21984	7.08333	7.93642	8.51397	6.73901	8.39111	8.01344	6.57804	7.02136	7.07164	5.82288	6.29946	6.1824	6.28906	7.47943	8.98395	8.59029	8.41108	7.6417	8.21935	7.91941	7.88478	7.98652	7.95908	8.31678	7.42998
	PC 18:1/18:2	3.59004	3.30665	3.68745	3.14061	3.24612	3.32299	3.25125	3.38314	3.55697	3.31536	3.90023	3.5035	3.92823		3.70835	3.52055	2.6642		3.47285	3.64165	5.07045	5.48495	5.40755	5.50702		5.85649	3.42286	3.66293	3.23697	3.57362	3.60842	2.82798	4.67734	5.47801	5.65423	4.94402	4.87754	6.01968	5.30539	4.24171	4.69254	4.89974	5.33828	5.54875	9.4209	9.22979	9.48243	8.91453
	PC 18:1/18:3	4.12141	4.0291	4.32635	3.8283	3.97227	4.09342	4.20125	4.11504	3.90523	4.58136	4.39696	4.71499	3.44055		3.28179	3.31136	3.12758		3.25097	3.9173	3.90563	3.60679	3.81759	3.7658	4.71248	6.00335	3.60473	3.5088	3.7847	4.18699	4.26676	3.99574	2.93103	2.96243	3.01005	2.71603	4.07766	5.41578	4.6859	4.28459	3.48727	3.52855	3.23534	3.27215	3.82651	3.67329	3.66953	3.66354
	PC 18:2/18:2	0.703212	0.657516	0.738611	0.533624	0.526979	0.566576	0.532256	0.505714	0.618504	0.592642	0.810251	0.622305	0.580119		0.740377	0.630067	0.432749	1.86721	0.526889	0.573078	1.22026	1.2282	1.2404	1.18918	0.800175	0.715292	0.635939	0.608479	0.713154	0.777359	0.573438	0.840126	1.20017	1.0007	0.995638	0.950815	0.873199	0.538441	0.927534	0.609902	0.829708	0.632653	0.827292	0.64039	2.30953	2.31408	2.12579	2.17492
	PC 16:0/20:5	1.04693	1.20058	1.31855	1.0431	1.20393	1.19339	1.04574	1.10942	1.11003	1.02326	1.19899	0.97591	1.68257	3.613		1.65412			1.1484	1.0219	1.26645	1.30353	1.36016	1.42062	1.59037		1.07635	1.14007	1.3056	1.05461	1.18584	0.926649	1.26487	1.08576	1.06459	1.27689	0.900212		0.833474	0.518326	0.557695		0.684036		0.756709	0.815343		0.825003
	PC 18:2/18:3	0.990182	0.952332	0.995145	0.869571	1.05129	1.00863	0.840507	0.879516	0.968286	0.965868	1.1467	0.865936	0.962172		1.06843	1.09343	1.35866	1.62238	0.888152	0.917355	1.51959	1.42441	1.73752	1.5155	2.13834	0.744849	1.15452	1.0626	1.14056	1.14295	1.00565	1.18283	1.29293	1.498	1.36931	1.23469	1.48043	0.748562	1.40449	1.13674	1.22443	1.27676	1.17635	0.836182	2.29701	2.09402	2.05529	2.08304
	PC 16:1/20:5	0.886272	1.11869	0.952078	0.961731	1.0193	1.18704	0.904385	0.927992	0.948274	0.982067	0.932476	1.00855	1.04265	2.06276	1.13048	1.14416	1.39337	3.62445	1.28047	1.5256	1.18469	1.19294	1.20507	1.15125	1.16295	1.20417	1.30273	1.37326	1.49835	1.2978	1.19323	1.69614	1.10675	1.32703	1.1624	1.49208	0.993621	1.27488	0.97208	0.976572	0.96227	0.873544	0.696167	0.723588	0.692747	0.793389	0.75546	0.663087
	PC 18:1/19:1	2.76374	2.74637	2.43927	2.97996	2.52874	2.40429	2.99528	2.68242	2.91739	2.83126	2.74853	2.97104	1.98927		3.02961		2.24952	5.21126	2.12393	2.29731	2.67003	2.86658	2.82486	2.57121	3.51031	5.6019	2.45941	2.28541	2.93974	2.4878	3.20298	2.7702	3.37758	3.41179	3.33575	3.23804	1.74943		2.20519	2.20693	2.75944	2.24382	2.8606	3.28663	2.22037	2.26077	2.42146	2.2551
	PC 18:2/19:1	0.85551	0.744333	0.79201	0.716299	0.660598	0.684077	0.669801	0.740323	0.814207	0.75079	0.839459	0.767621	0.66093	1.35367	1.14354	0.790959	0.796026	1.09625	0.611704	0.703941	1.2108	1.14416	1.19603	1.39833	1.39965	1.36956	0.691399	0.701744	1.04009	0.892717	0.925667	0.881079	1.78855	1.51219	1.58792	1.60637	0.945295		0.934363	0.857859	1.07582	0.978272	1.09921	1.18996	1.52316	1.59165	1.27119	1.38969
	PC 17:1/20:3	0.794222	0.7293	0.789937	0.718168	0.783655	0.716211	0.757051	0.710206	0.727913	0.687614	0.584537	0.652023	1.14044	1.93867				0.802853	1.0217	0.881588	0.716864	0.620425	0.69112	0.727112		1.10186			1.14872	0.954539	1.03729	0.97947	1.19656	0.371746	0.776274	0.782016	0.976171	1.5491			1.30845		1.01129		0.76126	0.72019		0.929535
	PC 18:3/19:1	0.884388	0.796885	0.754423	0.791469	0.957909	0.911867	0.916561	0.772929	0.908635	0.843545	0.703818	0.899156	0.513983	1.77769	0.891162	0.599637	0.708758		0.429593	0.752839	0.877462	0.621797	0.867934	0.75462	0.948203	0.799956	0.688007	0.631944	0.95642	0.976387	0.939353	1.13669	0.877498	0.7264	1.00106	1.11335	0.853188		0.722151	0.827854	0.738549	0.646419	0.696772	0.730626	0.646512	0.664314	0.696345	0.702545
	PC 17:0/20:5	2.19729	2.53179	2.3969	2.684	2.10273	2.10377	2.49688	2.13225	2.43279	2.37899	2.08558	2.45417	1.51578	5.43474	1.70574	1.25318	1.01976		1.1202	1.11919	1.30594	1.30138	1.33941	1.21088		1.73415	0.83848	0.773856	0.627911	0.834787	0.803963	0.859154	0.93253	0.996058	1.0013	0.993331	0.79873	0.552345	0.806529	1.01413	0.870841	0.834764	0.994936	1.5036	0.875704	0.94669	0.965159	0.895225
	PC 17:1/20:4	1.31117	1.30525	1.2116	1.46649	1.42737	1.32971	1.29126	1.37023	1.2218	1.25558	1.10495	1.26374	1.21178	5.7934	2.55786	1.75509	1.22027	1.16148	1.44471	1.16145	0.944121	0.91017	0.818015	0.998657	2.25329	2.94904	1.10437	1.19358	1.24345	1.27588	1.25503	0.972079	1.2096	0.94109	1.13942	1.33637	0.968592	3.33656	1.16297	1.42222	1.31869	1.21938	1.27506	2.16504	0.967937	0.977785	1.23815	1.09919
	PC 17:1/20:5	2.26701	2.30491	2.28281	2.47372	2.23759	2.41337	2.3122	2.39457	2.27766	2.05942	1.84621	2.0616	2.65739		3.10403	2.6457	2.84552	3.36423	3.13315	2.66932	2.33745	2.32687	2.17855	2.56301	3.37317	3.8335	2.67679	2.51239	2.91223	2.91847	2.98398	2.82701	1.94043	2.18731	1.82976	2.19239	2.50486	3.28524	2.50028	3.09196	2.87334	2.4973	2.71875	3.2933	2.11579	2.11017	1.89341	2.03958
	PC 19:1/19:1	0.460356	0.433413	0.318609	0.431628	0.271173	0.367311	0.445094	0.433435	0.420789	0.373198	0.328625	0.449147	0.0973788	1.01458	0.502522	0.0771221	0.243583	0.401981	0.179908	0.157601	0.375281	0.369437	0.376936	0.361856		0.559347	0.19196	0.21076	0.593669	0.614524	0.665494	0.805647	1.23835	1.59145	1.7071	1.84437	0.127508	0.577897	0.161202	0.183105	0.25399	0.298297	0.287405	0.362924	0.347923	0.340927	0.371388	0.278502
	PC 18:1/20:2	2.88263	1.49754	2.64375	1.79349	2.54532	1.99642	2.04771	2.29886	1.50594	1.63369	1.2009	2.0127	3.19943				3.61848		2.18018	2.82027	2.00101	1.59645	1.85714	2.02303			3.11453	2.74303	2.80945	2.61835	2.35529	2.70863	2.34858	2.16476	2.28011	1.9797	2.64263					2.61732	1.7846		1.50754	1.45624		2.0675
	PC 18:1/20:3	2.91165	2.23114	2.68535	2.3169	2.64663	2.61123	2.4554	2.84572	2.20094	2.10239	2.33623	2.36217	3.62559		4.45024	3.21824	3.12656		3.56261	3.63016	3.07983	2.62518	2.59079	2.88415		3.87955	3.78283	3.42224	3.13678	3.41514	3.42643	2.85411	2.6654	3.0532	3.26459	2.6448	2.76013		3.15493	2.83076	3.02928	2.60864	2.69265	3.86563	2.44851	2.53952	3.37744	2.68131
	PC 18:0/20:5	1.99551	1.68943	2.03434	1.55806	1.55608	1.37525	1.23111	1.52401	1.00178	0.992422	1.18251	0.99013	1.4997			1.83079	1.00586		1.08837	1.47409	0.979365	0.776079	1.00322	0.707479	2.19805		1.2926	1.28873	1.12969	1.22838	1.28279	1.12453	0.705301	0.769403	1.07355		0.815211	0.518961	0.78957	0.965316	0.482991		0.537028	0.827603	0.508876	0.541349	0.63808	0.570445
	PC 18:1/20:4	3.62595	3.94464	3.52391	4.08934	3.62375	3.70287	3.8165	3.59435	3.60711	3.71414	3.685	3.73284	4.0549		4.82044	3.74579	3.6003	6.23781	3.7646	3.36605	2.44072	2.80687	2.84585	2.64114	4.39994	5.50447	3.52064	3.95451	3.06388	3.29029	3.34285	3.61135	3.02815	2.97913	2.91446	3.62138	4.00316	5.9141	4.56426	4.18792	4.21299	4.09848	4.70402	5.40362	3.4697	3.23647	3.73081	3.42435
	PC 18:2/20:3	0.851044	0.853064	0.847507	0.760877	0.777462	0.831102	0.796203	0.840058	0.798321	0.779132	0.843201	0.835846	0.970089			0.994782	0.923022		0.798668	0.912098	1.00608	0.896321	1.01238	0.984681	1.01933		1.12431	1.08419	0.854004	0.98072	0.881538	1.04614	1.08041	0.863879	1.07996	0.871282	1.03215	1.14824	1.0072	1.12284	1.2129	1.18369	0.842674	1.0695	1.34598	1.26152	1.48385	1.33328
	PC 18:1/20:5	6.31849	7.14808	6.82895	6.83346	6.71233	7.08321	6.55746	6.57584	6.46222	6.58773	6.81558	6.49009	8.73094	14.6479	10.73	7.88644	8.37319		9.25453	8.53098	6.62159	7.80383	6.36779	6.59881	10.0459	10.8901	9.32115	8.63143	7.31522	7.08236	7.9384	6.99326	6.75875	6.29236	6.52887	7.49538	10.4938	14.0716	10.6455	11.4721	10.1338	10.6368	11.2388	11.0531	8.46172	8.05199	8.1122	7.97307
	PC 18:2/20:4	1.44215	1.57568	1.53689	1.4743	1.52606	1.58523	1.42951	1.36239	1.50938	1.50834	1.73617	1.53874	1.27127	1.96322	1.14059	1.38994	1.28018		1.18837	1.31526	1.38739	1.23866	1.45753	1.35311	1.5257	1.45292	1.29878	1.12209	1.07494	1.10443	1.05345	1.16339	1.40651	1.43763	1.38164	1.44655	1.61196	2.34894	1.55446	1.40861	1.35316	1.44989	1.56703	1.78133	2.30841	2.18124	2.45099	2.28961
	PC 18:2/20:5	2.33276	2.57552	2.78282	2.39994	2.28943	2.55215	2.08193	2.31986	2.50062	2.43236	2.64925	2.33524	2.94359	3.99971	3.36355	2.51894	2.46643	1.6452	3.05531	2.76704	3.64041	4.09517	3.71614	3.72427	2.92962	3.15643	3.12571	2.77103	2.56173	2.98904	2.70899	2.56463	4.08632	3.21691	3.12539	2.99197	3.9105		3.79456	3.59966	3.37741	3.43629	3.91882	3.57084	5.61711	5.59375	4.83016	5.07819
	PC 18:3/20:4	1.21764	1.43846	1.39624	1.54827	1.53436	1.61822	1.54029	1.46093	1.4809	1.56203	1.46551	1.57712	1.07252		0.806459		1.06107	1.02094	1.08005	1.03112	1.22118	0.678852	1.25766	1.06541	0.858288	1.30036	1.03218	0.931937	1.15507	1.01455	1.01687	1.27374	0.839378	0.924384	0.889057	0.971377	1.42911	1.26915	1.37365	1.27766	1.21225	0.960268	1.10864	0.930904	0.993677	1.05118	1.08969	0.987085
	PC 18:3/20:5	2.37826	2.58018	2.60601	2.63129	2.48916	2.85825	2.30169	2.4114	2.52154	2.545	2.20919	2.44096	2.56744	1.92479	1.82736	2.60115	2.77573	2.3842	2.84902	2.90386	2.68988	2.17764	2.6472	2.42392	2.2596	1.968	2.78108	2.65139	2.62447	3.09018	2.72383	2.66325	1.73992	2.22612	2.32383	2.06388	3.69046	2.77118	3.14871	3.33106	2.37122	2.82616	2.66583	2.24641	2.25405	2.31356	2.28703	2.31495
	PC 19:1/20:4	1.01439	1.08467	1.15159	1.24745	1.0951	1.06008	1.12733	1.11212	1.11677	0.893431	1.02834	1.17925	0.888985	3.07005	1.30729	0.860302	1.24003	3.61168	0.747803	0.964862	0.652969	0.792935	0.800459	0.737467	1.41701	1.58443	0.741231	0.825359	0.888267	0.970253	1.05182	1.01898	1.254	1.188	1.22107	1.35608	1.08019	1.77699	1.01632	0.989725	1.18486	1.04418	1.08125	1.34394	0.830819	0.84809	0.812865	0.91902
	PC 19:1/20:5	1.83722	2.16317	1.96901	2.01086	1.74203	1.73641	1.76235	1.85006	1.66218	1.76541	1.92466	1.74249	2.3662	4.42566	2.52849	2.06614	2.0666	2.4022	2.23713	2.34348	2.11159	1.90475	1.96393	1.92693		2.85529	2.25542	2.27042	2.23507	2.5653	2.43669	2.67245	2.85183	2.8329	3.05758	2.93151	2.32298	2.49714	2.76421	3.14786	2.88087	2.78693	2.82168	2.77612	2.06927	1.88314	1.94271	1.97128
	PC 20:3/20:3	0.307411	0.30986	0.30106	0.334853	0.344939	0.307128	0.359836	0.254229	0.249551	0.342608	0.271209	0.262611	0.407792			0.318773			0.315503	0.391468	0.183305	0.15899	0.220617	0.1569			0.432107	0.356203	0.357593	0.322837	0.216791	0.528048	0.304977	0.223267	0.232456	0.31346	0.260108		0.336589		0.40822	0.302097	0.326635		0.212681	0.232469		0.321124
	PC 20:2/20:5	0.587276	0.402934	0.711082	0.539048	0.54415	0.631794		0.550014	0.433611	0.471691	0.441763	0.451122	1.07024	1.43995	1.16836	1.14698	0.527235	0.205449	0.848087	0.896482	0.529587	0.458908	0.717226	0.59262	1.13264	1.30761	0.81556	0.769797	0.634595	0.586952	0.658325	0.658809	0.878801		0.595886	0.586569	1.09763	0.707277	1.14724	1.12069	1.0031	1.15571	0.949313	0.978591	0.928148	0.896426	1.03978	0.96209
	PC 20:3/20:4	0.872462	1.16418	0.947752	1.16379	1.06817	1.03662	1.19745	1.0186	1.10449	1.07565	1.01083	1.01206	1.01709		1.29507	1.30854	1.01648	0.773691	0.871917	0.869106	0.535448	0.571685	0.527711	0.60425	1.32139	0.418684	0.80804	0.899727	0.731618	0.755377	0.744785	0.795142	0.574692	0.837995	0.799914	0.705935	0.718283	1.73472	0.860828	0.806478	0.769872	0.704292	0.931832		0.711597	0.677791	0.834799	0.798468
	PC 20:3/20:5	1.80431	1.7935	1.75185	1.71173	1.65654	1.67502	1.80265	1.7872	1.55326	1.51238	1.50169	1.35839	2.37976	2.73291	3.10591	3.04141	1.99358	1.89548	2.03159	1.72963	1.29021	1.33371	1.33161	1.28362	2.41017		2.32563	1.83237	1.54276	1.77167	1.59449	1.34081	1.42573	1.65105	1.4557	1.71114	2.1017	4.51923	2.40197	2.23669	2.45766	2.44076	2.19679		1.5197	1.53902	1.84849	1.62933
	PC 20:4/20:4	0.994897	1.26015	1.08	1.3024	1.04271	1.24787	1.26571	1.11918	1.34752	1.30016	1.12283	1.19201	0.753924	1.36948	0.705143	0.611037	0.779449		0.721437	0.638735	0.49068	0.479421	0.649343	0.542563	0.86342	1.27701	0.509535	0.493697	0.548995	0.561261	0.371159	0.455372	0.633617	0.722752	0.619179	0.713894	0.604991	1.16213	0.780591	0.879051	0.653934	0.866281	0.813146	0.875605	0.598038	0.590311	0.836289	0.634371
	PC 20:4/20:5	3.22464	3.66434	3.3567	3.51545	3.40805	3.16318	3.50108	3.4839	3.16987	3.50191	3.83975	2.97213	4.09568	6.58446	4.70594	4.23904	3.84655	1.88848	3.71731	4.28907	2.16468	2.46696	2.31627	2.38495	4.73605	4.24585	3.8283	3.74455	2.89773	2.86955	2.47229	2.74737	2.80124	3.01532	2.68608	2.95819	3.91307	5.0109	4.04567	4.45775	4.25566	3.89382	4.20791	4.55765	2.58169	2.78004	3.04077	2.70852
	PC 20:5/20:5	3.54263	3.47115	3.48394	3.28145	3.17041	2.99069	3.09513	3.14979	2.76474	2.69656	2.66499	2.30707	5.64215	8.87735	7.50399	5.97707	5.5051	2.49297	5.39823	4.90508	3.05065	2.8776	2.76026	2.84642	6.87189	6.27411	5.22712	4.99821	3.54064	3.71876	3.40294	3.34161	2.58015	3.17346	3.02734	3.18416	4.98232	5.12328	5.09513	5.73029	4.81502	5.36247	5.16139	5.42141	2.64003	2.94989	2.82503	2.75718
[truncated: 12 more columns]

## Sheet: PC_FA_Composition
		p1p2												p2												N2												mn
	Composition (mol%)	15°C				20°C				25°C				15°C				20°C				25°C				15°C				20°C				25°C				15°C				20°C				25°C
	FA 15:0	1.94275	2.34194	1.55742	2.2151	1.68527	2.04689	2.2134	1.69285	2.24634	2.25624	2.03949	2.36632	0.800965	1.00238	0.595251	2.0509	1.12781	1.09335	0.840422	0.840432	1.1562	1.16676	1.21348	1.11059	0.203088	0.451635	0.639303	0.567955	1.05922	0.731464	0.883004	0.851989	1.63629	1.55756	1.2376	1.2477	0.881219	0.284516	0.40496	0.37272	0.857968	0.896779	0.664639	0.411253	0.706044	0.674266	0.406403	0.792988
	FA 16:0	1.85736	1.84188	1.86546	1.52579	1.92093	1.87432	1.57926	1.77933	1.822	1.90362	2.11592	1.81388	2.03697	2.07733	1.38133	2.18997	1.61945	16.4634	2.00613	1.8501	2.31057	2.38705	2.24625	2.48602	0.762697		1.49823	1.66005	2.16225	1.95462	1.92132	2.0267	1.89719	2.28973	2.04625	2.40664	0.80187	2.04886	0.583124	0.958427	1.50631	0.986768	0.728709	0.414178	0.999751	0.98542	1.18526	0.953034
	FA 16:1	1.14875	1.30081	0.951848	1.11477	1.13862	1.1601	1.16142	1.08961	1.10932	1.14512	1.19685	1.17561	1.12637	1.21538	1.31816	1.10895	1.81534	1.13544	1.60679	1.23902	1.66613	1.71017	1.86961	1.76422	1.12961	0.980034	1.48277	1.55995	2.05256	1.54371	1.74027	2.06576	1.85852	1.69034	1.5899	1.83392	0.985145	1.04145	0.808262	1.64884	1.15533	0.82071	0.887541	0.619954	0.925594	0.825723	0.910253	0.766064
	FA 17:0	5.04985	5.15825	4.84258	5.31188	4.77007	5.11411	5.54942	5.07201	5.8158	6.20942	5.56851	5.99562	2.71416	5.07064	1.81128	2.00901	2.8228	0.914787	2.56056	2.43226	3.14755	3.02142	3.29657	2.88929	0.155275	0.872322	1.50627	1.44726	1.60205	1.49887	1.6439	1.27144	2.81054	3.44911	2.94016	2.72897	1.9114	0.38068	1.96921	1.40637	2.19025	2.4768	1.77813	3.14011	2.23659	2.18844	2.41091	2.42737
	FA 17:1	6.89517	6.86043	6.77919	7.30398	7.00206	7.71826	7.48051	7.37316	7.5638	7.13355	6.69435	7.28355	6.05671	13.9069	8.06687	7.43686	6.97631	11.1278	7.28592	6.34849	7.1358	6.99509	6.77768	7.01246	10.2611	9.67746	5.68125	5.85079	8.17015	7.63832	8.42382	7.06503	6.93208	6.58064	5.9871	6.47486	5.39406	10.8173	5.30381	6.30767	6.49499	5.34859	5.01583	7.14421	5.41897	5.43725	5.83479	5.96322
	FA 18:0	3.5312	2.6297	3.25958	2.73583	3.28073	2.68759	2.9237	3.25082	2.37318	2.68649	2.70002	2.47403	2.50531	5.93988		3.75399	2.8701	12.759	2.4902	2.19858	2.19979	2.08127	2.0179	1.88262	4.37587		3.02286	4.06415	2.72829	2.78957	2.89955	2.62604	1.91747	1.86262	2.09208	1.62904	1.10112	0.122138	1.47148	1.86212	1.41116	0.763918	1.01966	1.41714	1.03418	1.02271	0.867435	1.24081
	FA 18:1	34.8193	31.3814	33.8715	31.9458	35.757	33.6548	34.4508	35.4153	33.2353	33.6277	33.6688	35.3257	33.7236	13.0209	32.0239	30.2312	34.0591	18.9997	33.3765	35.3733	35.17	34.8725	33.5315	35.254	30.4259	33.8776	36.429	36.6845	37.1612	37.0194	37.1171	35.3653	31.4042	32.2733	33.5399	33.3451	30.7498	29.8006	32.7295	28.5305	28.4841	32.8433	29.3209	32.8159	28.4046	28.0276	29.8659	28.6707
	FA 18:2	6.20837	5.99665	6.24482	5.81033	5.401	5.57659	5.13526	5.39593	6.1245	5.94853	7.03071	5.60213	7.73126	4.92723	8.97648	8.60312	7.66736	8.20554	7.0882	6.87194	11.9822	13.3827	12.6586	12.8078	9.20735	9.88402	8.2967	8.33763	7.22083	8.16604	7.3676	8.02059	13.0502	12.0475	12.3057	10.6991	11.2541	6.339	10.7638	9.73681	11.2697	10.8702	11.7833	11.0134	21.0165	20.667	19.1987	19.6147
	FA 18:3	2.22738	2.72063	2.41561	2.65198	2.68996	2.71252	2.69885	2.49774	2.74591	2.92791	2.79053	2.7891	2.03864	2.1164	2.75141	3.05951	3.39347	2.08208	3.03739	3.04644	4.24765	4.15593	4.30028	4.18776	4.33216	2.95139	3.18447	3.46363	4.37829	4.24462	3.88837	4.49244	3.50997	3.05523	2.91118	3.41898	4.03956	4.53595	3.78098	4.23847	3.86415	3.81214	3.7185	2.87259	4.9045	4.91412	4.76104	4.80458
	FA 19:1	4.21743	4.27231	3.93605	4.38588	3.94036	4.04982	4.32638	4.0465	4.33692	4.23966	3.83931	4.48655	2.64149	7.78156	4.3978	2.31411	3.16011	4.40614	2.80416	2.88922	3.95437	3.94589	4.25341	3.91984	3.42771	5.75657	3.47686	3.14983	4.71328	4.55991	4.95832	5.48471	6.25238	6.9964	7.35387	7.36453	3.04762	3.33563	3.61885	4.06821	3.85081	3.94683	4.40407	3.70721	3.62875	3.67354	3.61583	3.81965
	FA 20:2	0.403026	0.319365	0.441406	0.377638	0.391356	0.399552	0.17954	0.315942	0.324275	0.322884	0.284576	0.378552	0.794214	0.815158	0.36512	0.350953	0.428765	0.205449	0.597405	0.58369	0.42308	0.508737	0.515023	0.433404	0.422362	0.321136	0.480289	0.549412	0.473584	0.335917	0.344681	0.502073	0.865402	0.209305	0.537524	0.647711	1.01325	0.375709	0.450834	0.414392	0.386178	0.955578	1.06997	0.451164	1.0049	0.96465	0.427953	1.03042
	FA 20:3	3.76255	4.08962	3.70446	3.86808	3.72642	3.86436	3.97864	3.63837	3.76414	3.55446	3.6701	3.61636	4.18631	0.965066	4.44776	4.48306	3.16427	1.77983	4.17864	3.42087	2.71621	2.56612	2.85409	2.57951	2.1923	0.786384	3.37866	3.03826	3.27771	3.07388	2.9641	3.38183	3.48078	3.02582	2.90211	3.24851	4.33671	5.30655	3.83618	3.60638	5.42775	3.83618	4.39596	1.99049	3.78752	3.96453	4.03125	4.24955
	FA 20:4	8.42998	9.85483	9.07548	10.2	9.17836	9.56155	9.73632	9.23762	9.49404	9.43851	10.0775	9.36957	8.9202	8.35286	9.42461	6.71365	7.87525	6.37554	7.8293	8.21939	5.73522	5.39285	6.26864	5.82281	8.58093	10.1678	7.40016	7.30337	6.18202	6.45373	6.1594	6.77238	6.71722	6.79908	6.51465	7.23895	9.10919	12.1228	9.20897	9.25576	9.16882	8.41484	10.1113	9.95923	7.30013	7.53439	8.19904	7.58293
	FA 20:5	19.5069	21.2322	21.0546	20.5529	19.1179	19.5795	18.5865	19.1948	19.0444	18.6059	18.3234	17.3231	24.7238	32.8083	24.4401	25.6947	23.0199	14.4519	24.2984	24.6863	18.1552	17.8136	18.197	17.8497	24.5237	24.2736	23.5232	22.3232	18.8186	19.9899	19.6886	20.0737	17.6678	18.1634	18.0419	17.7159	25.5495	23.7768	25.3532	28.0427	23.7151	24.1234	25.5587	23.3463	18.5535	19.1651	18.2275	18.2879
	SFA	12.3812	11.9718	11.525	11.7886	11.657	11.7229	12.2658	11.795	12.2573	13.0558	12.4239	12.6499	8.05741	14.0902	3.78787	10.0039	8.44016	31.2306	7.89731	7.32138	8.81411	8.6565	8.7742	8.36852	5.49693	1.32396	6.66667	7.73942	7.55181	6.97453	7.34778	6.77617	8.26149	9.15902	8.31609	8.01236	4.69561	2.8362	4.42877	4.59963	5.96569	5.12426	4.19114	5.38268	4.97656	4.87084	4.87	5.4142
	MUFA	47.0806	43.8149	45.5386	44.7504	47.838	46.583	47.4191	47.9246	46.2454	46.1461	45.3993	48.2714	43.5482	35.9247	45.8067	41.0911	46.0109	35.6691	45.0734	45.85	47.9263	47.5236	46.4322	47.9506	45.2443	50.2917	47.0699	47.245	52.0972	50.7613	52.2395	49.9808	46.4472	47.5406	48.4708	49.0185	40.0021	44.707	42.1772	40.1059	40.2027	42.8634	39.1711	44.9842	38.4564	37.9194	40.2845	39.0158
	PUFA	40.5382	44.2133	42.9363	43.461	40.505	41.6941	40.3152	40.2804	41.4973	40.7982	42.1768	39.0788	48.3944	49.985	50.4054	48.905	45.549	33.1004	47.0293	46.8286	43.2596	43.8199	44.7936	43.6809	49.2588	48.3844	46.2634	45.0155	40.351	42.2641	40.4127	43.243	45.2913	43.3003	43.2131	42.9692	55.3023	52.4568	53.394	55.2945	53.8316	52.0123	56.6377	49.6332	56.5671	57.2098	54.8455	55.57
[truncated: 12 more columns]

## Sheet: PE_Composition
		p1p2												p2												N2												mn
	Composition (mol%)	15°C				20°C				25°C				15°C				20°C				25°C				15°C				20°C				25°C				15°C				20°C				25°C
	PE 15:0/15:0	0.24282	0.472291	0.227085	0.379223	0.219834	0.300582	0.433035	0.234746	0.339436	0.521675	0.292472	0.404015	0.0412556	0.0953261	0.113224	0.0692033	0.0972106	0.0379985	0.0983225	0.068101	0.156608	0.147386	0.15162	0.15482	0.0719016	0.0929006	0.0495479	0.0435712	0.119766	0.0787442	0.0995871	0.0714738	0.199368	0.168077	0.12132	0.210221	0.0678671	0.0975457	0.0441966	0.0909578	0.10391	0.056447	0.0775204	0.0903106	0.0940285	0.0959975	0.0995537	0.470796
	PE 15:0/16:0	0.32338	0.433712	0.34761	0.378608	0.354758	0.329936	0.432155	0.365329	0.510637	0.524222	0.522461	0.460213	0.444378		0.427487	0.567824	0.514482	0.570313	0.498506	0.45807	0.749491	0.958539	0.898251	0.900077			0.19892	0.161975	0.348971	0.31388	0.319321	0.326801	0.574481	0.546851	0.505455	0.461173	0.250222	0.441987	0.244103	0.21975	0.270667	0.169135	0.232585	0.36545	0.406469	0.465917	0.372126	0.444779
	PE 15:0/16:1	0.129862	0.163792	0.117919	0.147786	0.108829	0.132481	0.172702	0.136042	0.168301	0.1834	0.138255	0.140837	0.103749		0.14554	0.101869	0.131748	0.232717	0.154789	0.107077	0.115326	0.126327	0.148626	0.124568	0.259847	0.143543	0.153813	0.124893	0.207506	0.156263	0.194731	0.19451	0.187609	0.145764	0.118158	0.162476	0.129185	0.0776267	0.105486	0.119412	0.124777	0.0998092	0.106037	0.181533	0.0981632	0.105813		0.171652
	PE 16:0/16:0	0.337564	0.256918	0.297967	0.22291	0.365309	0.249137	0.254476	0.340127	0.332437	0.347214	0.445022	0.295112	0.513963	0.745969	0.677865	0.598894	0.490786	0.787701	0.571834	0.437771	0.680408	0.827422	0.72369	0.759524	0.367276	0.658351	0.174173	0.0895647	0.166744	0.153231	0.185706	0.227517	0.254909	0.210338	0.168976	0.180706	0.207973	0.890606	0.159556	0.364838	0.139955	0.144823	0.151996	0.525333	0.190606	0.168937	0.420261	0.224663
	PE 15:0/17:0	1.77966	2.79221	1.84508	2.58063	1.74304	2.14565	2.80068	2.07493	2.79549	2.65352	2.7996	2.65261	0.895731	0.578729	0.785412	0.897648	1.12181	0.410584	0.98623	0.995694	1.46856	1.79284	1.53415	1.65514	0.248448	0.190579	0.274195	0.323049	0.473108	0.452524	0.432259	0.516703	1.19104	1.0299	0.9648	1.02454	0.558209	0.224694	0.357408	0.589694	0.782406	0.794236	0.71749	0.444181	0.81795	0.830859	0.609029	0.866145
	PE 15:0/17:1	0.66744	0.702545	0.616422	0.676294	0.653661	0.624029	0.765268	0.624419	0.879438	0.93832	1.02584	0.83595	0.999544	1.30678	1.24064	1.1327	1.01532	1.15969	1.01605	0.891585	1.36503	1.47087	1.38031	1.4849	0.775692	1.12913	0.452471	0.450509	0.637878	0.5885	0.687894	0.64472	1.41345	1.22972	1.17918	1.17613	0.863001	1.04549	0.693731	0.738207	0.929767	0.868186	0.964744	0.967981	0.945095	0.903788	0.869554	1.06035
	PE 16:0/16:1	0.734701	0.280542	0.315869	0.308025	0.28372	0.303826	0.329268	0.365778	0.330345	0.283342	0.316252	0.32885	0.846566	2.23591	1.67647	1.23934	0.760107	3.54657			0.633346	0.563741	0.517537	0.49984	1.28236	2.62852	0.715747	0.686836	1.02449	0.720631	1.08571	0.767212	0.932815	0.548011	0.487626	0.452658		2.73775	0.695475			0.964494	0.436741	1.85141	0.290653	0.305378	1.88295	0.904106
	PE 15:0/18:0	0.935318	1.27045	1.03768	1.13634	0.945192	1.15731	1.24571	1.08464	1.21348	1.29537	1.26715	1.31252	0.667576	0.379039	0.527396	0.656943	0.688785	0.0121448	0.628142	0.639086	0.851916	0.925486	0.874231	0.882153	0.11632	0.200951	0.194118	0.209453	0.227283	0.212827	0.268578	0.181845	0.405151	0.428965	0.356387	0.434624	0.289673	0.187146	0.187968	0.323766	0.361851	0.252743	0.328648	0.239584	0.352739	0.376514	0.241977	0.349898
	PE 16:0/17:0	1.42011	1.49818	1.54111	1.4137	1.61789	1.46741	1.51448	1.67269	1.64096	1.63706	2.18897	1.71635	1.48152	1.30561	1.35474	1.66714	1.50118	1.03615	1.52009	1.50968	1.72359	1.83994	1.80878	1.78145	0.567386	0.652663	0.342378	0.285517	0.452308	0.359517	0.370115	0.441753	0.697894	0.654603	0.630249	0.733377	0.438049	0.605563	0.389734	0.521172	0.698537	0.601468	0.573095	0.660062	0.646449	0.652842	0.639259	0.698433
	PE 15:0/18:1	1.0201	1.35298	1.02134	1.26755	0.965425	1.28153	1.30281	1.13039	1.31587	1.36829	1.40226	1.45836	0.813136	0.722859	0.747274	0.968221	1.0226	0.73274	0.895501	0.92171	0.789752	0.913537	0.884727	0.835578	0.807343	0.670578	0.771634	0.628798	1.04771	0.795295	0.853644	0.925181	0.842242	0.808605	0.772356	0.784148	1.22933	0.53325	0.943013	1.20519	1.16684	1.09825	1.35787	0.748555	1.09853	1.04971	0.788307	1.03741
	PE 16:0/17:1	2.9394	0.987692	1.45907	1.30404	1.10717	1.115	1.70871	1.65512	1.46492	1.52966	1.23411	1.49378	4.79165	17.1932	10.3521	5.04398	2.54657	21.1811	2.7998	1.78563	3.41203	1.96579	1.61466	1.97316	10.0016	16.2087	2.10241	1.92382	2.70512	2.16304	3.89184	1.92913	4.94707	1.83153	1.64374	1.97592	3.40184	22.4092	5.19839	3.17817	3.48815	5.38006	3.27796	12.3495	2.17987	1.54474	10.1534	6.15816
	PE 15:0/18:2	0.15012	0.177772	0.165735	0.186059	0.181577	0.179435	0.181815	0.186115	0.198113	0.234112	0.175682	0.213475	0.196328		0.149606	0.231024	0.340191		0.221717	0.270825	0.257266	0.359985	0.308302	0.275459	0.296238		0.350875	0.28516	0.380386	0.288193	0.330042	0.351013	0.296786	0.327068	0.283307	0.301225	0.456518	0.0839329	0.372178	0.533126	0.510061	0.403882	0.45913	0.415895	0.513758	0.563537	0.401335	0.516473
	PE 16:0/18:0	0.771434	0.776663	0.848264	0.74604	0.898293	0.757519	0.770638	0.885	0.694555	0.638005	0.895089	0.725839	0.77186		0.802175	0.996156	0.753481	1.04297	0.960274	0.868418	0.767696	0.818539	0.777379	0.703994	0.26201	0.501751	0.308157	0.278043	0.367865	0.242415	0.231386	0.216001		0.270388	0.223366	0.281774	0.300299		0.207744	0.438408		0.337887	0.19833	0.246229	0.16659	0.171559	0.409698	0.244832
	PE 17:0/17:0	3.4198	4.48716	3.71196	4.40576	3.65606	4.16778	4.45196	4.05136	4.41079	4.88845	4.64064	5.31207	1.53739	0.925023	1.20591	1.49555	1.38174	0.485417	1.29503	1.44397	1.37058	1.37609	1.39793	1.42765	0.233313	0.158205	0.269369	0.266628	0.218382	0.228639	0.246944	0.256579	0.658463	0.705991	0.694053	0.662758	0.809627	0.313131	0.636473	0.689182	1.09426	0.807345	0.958278	0.685236	1.0569	1.08206	0.773469	1.02261
	PE 16:0/18:1	2.76746	2.03639	2.39591	2.09598	2.39973	2.21326	2.21192	2.61536	2.57261	2.38596	2.56631	2.40081	3.99015	7.77877	5.94074	3.83876	3.13635	7.73963	3.77323	3.30718	3.75662	3.70948	3.38051	3.5829	5.78742	7.4442	3.28086	3.22507	4.06256	3.99897	4.46553	4.06301	3.27751	2.76691	2.61541	2.80502	2.83006	8.92231	3.11613	2.92872	2.78021	3.1806	2.6454	5.07139	2.37639	2.26857	4.89706	3.26634
	PE 16:1/18:0	0.292953	0.349768	0.369829	0.27603	0.361148	0.354452	0.300017	0.346328	0.255965	0.241745	0.299465	0.273984	0.394267				0.32616		0.535961	0.221014	0.222285	0.36095	0.31687	0.302113		0.199357		0.594931	0.891245		0.627576	0.764199		0.371924	0.375549	0.313069	0.135282				0.119719	0.0903449			0.111769	0.138155
	PE 17:0/17:1	2.2961	2.22491	2.34948	2.49594	2.24144	2.5232	2.41714	2.33621	2.73035	2.42733	2.58317	2.7607	1.79219	1.57794	1.66972	1.95325	1.79941	1.10995	1.71439	1.78162	1.77178	1.91932	2.03051	1.86538	1.27608	1.36582	1.80941	1.71657	1.63501	1.76806	1.78854	1.64225	1.72436	1.81166	1.78545	1.95055	1.30985	0.932383	1.20992	1.38378	1.67195	1.61088	1.49287	1.26731	1.61789	1.73952	1.46439	1.58412
	PE 16:0/18:2	0.340592	0.359076	0.402407	0.306244	0.318046	0.364739	0.330254	0.370153	0.492388	0.474017	0.60048	0.380979	0.749619	0.490541		0.942384	0.656673	0.608511	0.77186	0.714769	0.908708	1.23229	1.19507	1.10285	0.61109	0.515907	0.986278	1.03606	1.08003	0.82315	1.03235	1.03812	0.946233	0.848914	0.789222	0.75877	0.935869	0.505077	0.734789	0.889556	0.949106	1.07909	0.965247	0.602817	1.78943	1.92258	1.26273	1.45679
	PE 16:1/18:1	0.826205	0.543156	0.583491	0.561683	0.583869	0.620305	0.573145	0.669966	0.644357	0.613534	0.590206	0.617913	1.20652	2.00539	1.65877	1.24289	1.09308	2.2144	1.04158	1.07772	0.792656	0.808404	0.717247	0.726896	1.80725	2.01057	1.38459	1.32431	1.29875	1.2488	1.35835	1.32967	0.967813	0.867361	0.860103	0.764955	1.27649	2.17362	1.45599	1.23048	1.24697	1.3809	1.17378	1.56718	0.838536	0.845527	1.88702	1.36041
	PE 17:1/17:1	0.654879	0.425037	0.599158	0.459478	0.572335	0.550341	0.511101	0.601612	0.637322	0.594336	0.575473	0.546718	0.94691	1.47812	1.3227	0.960131	1.05272	1.98572	0.967519	0.989838	1.2596	1.26963	1.24799	1.23886	1.59409	1.86465	1.33117	1.24856	1.20024	1.46173	1.54244	1.29317	1.45082	1.29674	1.39427	1.3319	0.832122	1.89315	0.871077	0.92746	0.885592	0.950259	0.927117	1.46484	0.812272	0.766516	1.28085	1.07804
	PE 16:0/18:3	0.106737	0.117608	0.103206	0.124003	0.132809	0.176658	0.147064	0.166825	0.187817	0.197021	0.25265	0.182107	0.114116	0.25444	0.244765	0.162912	0.305587			0.183555	0.244635	0.392105	0.335872	0.365711	0.277683		0.312427	0.344707	0.541305	0.386561	0.489914	0.369532	0.22702	0.211928	0.193869	0.265077	0.204101		0.216902		0.371632	0.250548	0.291837		0.336602	0.364085	0.293971	0.287943
	PE 16:1/18:2	0.0856844	0.0544349	0.0866357	0.0819563	0.107604	0.0967908	0.0618861	0.0848216	0.103142	0.0969136	0.0999091	0.087666	0.169475	0.189253	0.312605	0.3667	0.329562		0.253219	0.313458	0.215552	0.228579	0.226083	0.199259	0.326669	0.246818	0.449432	0.374825	0.48113	0.324678	0.283816	0.448648	0.22898	0.222091	0.27098	0.25695	0.241736	0.105787	0.264079	0.341653	0.289061	0.218059	0.239504	0.33968	0.241831	0.260705	0.215554	0.280542
	PE 17:0/18:0	2.91654	3.17366	3.04658	3.22662	2.99969	3.2133	3.40163	3.06587	3.03428	3.18499	2.95374	3.23524	1.31107	0.736565	1.0637	1.11354	1.30054		1.20102	1.20121	1.16941	1.16005	1.16505	1.15459	0.510385	0.269428	0.406259	0.412558	0.410737	0.505185	0.501043	0.4805	0.611005	0.606454	0.5958	0.574561	0.561801	0.280058	0.390654	0.564694	0.485934	0.535199	0.510545	0.392825	0.578808	0.572353	0.452568	0.45666
	PE 16/0:19:1	0.888136	0.330767	0.411933	0.440962	0.344223	0.341317	0.538676	0.513815	0.487598	0.512932	0.326911	0.448677	1.20329	5.09232	2.95119	1.41362	0.752302	7.50044	0.787997	0.528389	0.98481	0.489767	0.461659	0.553562	3.41017	5.30064	0.633752	0.592088	0.923318	0.702892	1.0598	0.716933	1.69792	0.587306	0.506673	0.603024	0.996988	7.72584	1.51014	1.01871	1.08208	1.57343	1.09711	3.72115	0.733842	0.530339	3.26005	2.2535
	PE 17:0/18:1	18.0442	20.7884	19.253	19.4879	19.5853	19.4437	19.8776	19.6437	19.8634	21.0958	20.5363	19.9363	12.8274	6.94584	10.6585	11.0379	13.2705	3.53143	14.1039	13.9846	15.47	15.5195	15.5308	16.0253	7.4902	4.92327	10.0116	10.2451	11.8775	13.3647	11.462	12.3325	13.1494	14.9509	15.2873	14.9402	8.19597	2.55519	8.25451	9.15957	8.60482	8.05344	8.77467	6.30438	8.96291	9.56408	6.4356	7.8888
	PE 17:1/18:0	1.17675	1.07729	1.29476	1.20748	1.405	1.36942	1.19656	1.3716	1.11136	1.1258	1.06389	1.15504	1.23484	1.13637	1.11275	1.12489	1.21024	1.39269	1.26982	1.21907	1.10853	1.13846	1.14476	1.11728	1.4456	1.32081	1.75744	1.76919	1.68249	1.86028	1.80257	1.63151	1.20632	1.40336	1.31778	1.30324	0.724139	0.797599	0.730809	0.753675	0.782917	0.91349	0.760153	0.818842	0.709854	0.73218	0.92121	0.737725
	PE 17:0/18:2	2.87145	2.56626	2.84698	2.68045	2.59717	2.37734	2.50538	2.48784	2.60886	2.73342	3.04865	2.48756	3.4523	1.61598	2.48898	3.31032	2.81884	0.700481	2.85105	2.84463	3.18739	3.20045	3.52238	3.42379	3.37397	1.79711	4.36378	4.42196	2.92373	3.37819	2.96662	3.10597	3.496	3.52423	3.69175	3.52787	3.42602	0.978706	3.29063	3.17967	3.0994	3.50024	3.58254	2.23092	4.42341	4.50133	3.04262	3.86233
	PE 17:1/18:1	10.2821	7.80552	9.83046	7.9325	11.1173	9.45527	8.03443	10.4625	10.1552	9.02845	9.98352	8.26281	16.1137	14.2966	15.6778	15.0249	17.5204	11.4091	18.4718	19.3874	20.9298	21.0922	19.9603	20.9451	17.1062	16.1966	19.7957	20.6244	18.9912	21.7791	19.1838	19.7771	20.3215	22.2879	23.9858	22.3971	14.9816	13.3692	15.7445	14.5492	14.3404	14.3743	14.9722	14.4926	16.4246	16.2299	13.9852	14.9677
	PE 17:1/18:2	1.32533	0.935788	1.26284	0.95457	1.38023	1.09223	0.896926	1.17957	1.36626	1.24007	1.49605	1.09116	2.93759	0.999759	2.25671	2.70372	2.89885	0.812362	2.87734	3.00351	3.38035	3.44914	3.50264	3.55943	2.92163	1.8916	4.10194	4.53293	3.07439	3.73301	3.2005	3.2325	3.28992	3.6165	4.19303	3.90589	4.30175	0.915313	3.78367	3.8701	3.71387	3.91189	3.94439	2.38044	4.57088	4.60699	2.98974	3.72286
	PE 18:0/18:0	0.515417	0.559831	0.570831	0.583672	0.557144	0.542273	0.529116	0.544595	0.41098	0.453616	0.359811	0.451445		0.20237	0.193585	0.274046	0.187224	0.523206	0.2938	0.236764	0.156307	0.160526	0.186753	0.144377	0.207628			0.119301	0.249986	0.122055	0.112355	0.201838	0.152744	0.130281	0.111682	0.180873	0.16075		0.119167	0.263972	0.0944544	0.191976	0.132046	0.167177	0.0569742	0.0651721	0.0863031	0.0671374
	PE 16:0/20:1	0.23304	0.191513	0.177967	0.162745	0.195575	0.190357	0.148249	0.175094	0.170025	0.155858	0.146446	0.152626	0.248233	0.871236	0.578952	0.245386	0.240049		0.23299	0.17088	0.206703	0.175009	0.175536	0.177375	0.543248	0.65293	0.180908	0.208678	0.247804	0.156962	0.15171	0.227474	0.189443	0.172281	0.132115	0.196044	0.144438		0.201292	0.370412	0.201483	0.274416	0.19208	0.453943	0.151756	0.151987	0.421126	0.233257
	PE 17:0/19:1	1.25756	1.46305	1.3114	1.67034	1.32567	1.51403	1.51106	1.40022	1.47789	1.54393	1.33338	1.59347	0.575473	0.651071	0.565209	0.674551	0.58022	0.482126	0.605103	0.654105	0.584688	0.640147	0.670241	0.622566	0.552767	0.573242	0.610959	0.56982	0.590176	0.556083	0.540597	0.532583	0.686743	0.64339	0.707578	0.596249	0.668677	0.440145	0.520976	0.670027	0.775868	0.580098	0.698446	0.687837	0.615685	0.621662	0.589605	0.603491
	PE 18:0/18:1	6.90323	7.68693	7.42615	7.5416	7.66411	7.01013	7.53588	7.40082	6.19242	6.10998	5.9476	6.39112	5.50387	3.16534	4.33722	5.02356	5.16072	1.41052	5.27152	5.43309	4.19192	4.39792	4.21792	4.27201	3.66916	2.7756	4.87758	4.72531	5.10215	5.26078	4.94743	5.48591	3.41405	4.02988	3.93974	4.41234	2.50391	1.36281	2.43818	2.66269	2.60541	2.32396	2.31347	2.07832	2.59711	2.77082	2.00414	2.21014
	PE 17:1/19:1	0.787501	0.543191	0.656713	0.625807	0.615813	0.630754	0.639906	0.590355	0.655914	0.630505	0.526669	0.578181	0.892018	2.26279	1.40049	1.21796	0.889858	3.24893	0.922733	0.881776	1.00612	0.750337	0.859374	0.738307	1.87196	2.28665	0.974898	0.99486	1.03341	0.915223	1.168	0.958137	1.4405	1.04546	0.89838	1.02316	1.1	2.75408	1.14592	1.18992	1.19883	1.20678	1.09795	1.80172	0.908491	0.779298	1.94596	1.37634
	PE 18:0/18:2	1.28258	1.23578	1.43487	1.22856	1.03182	1.09068	1.00263	1.05477	0.89864	0.911428	0.84365	0.946398	1.71182	0.835756	1.23929	1.49416	1.19119	1.09775	1.27642	1.1374	1.14359	1.36167	1.26412	1.24747	1.28495	1.12732	1.90745	1.9219	1.56585	1.46996	1.55774	1.57931	1.37477	1.45381	1.43657	1.46441	1.39871	0.271333	1.30193	1.54591	1.49698	1.40879	1.38228	0.82039	1.78478	1.91052	1.27002	1.55811
	PE 18:1/18:1	5.19121	5.29698	5.20051	5.26245	4.7318	5.1789	5.22236	4.92645	5.04878	4.47656	4.68037	5.13467	5.55916	6.29718	6.16727	4.9842	4.62368	5.16432	4.73781	4.88182	3.54613	3.81487	3.43385	3.61904	5.5443	6.36419	5.45889	5.47102	4.78993	4.44245	5.13861	4.16618	4.01066	3.75971	3.5714	3.68063	8.93032	7.68572	10.3143	8.78586	8.41214	7.6704	8.39018	7.26857	8.05496	7.67459	6.82529	7.25174
	PE 16:0/20:3	0.283393	0.186	0.2389	0.185985	0.252642	0.261012	0.210721	0.24479	0.216811	0.240082	0.255025	0.223682	0.265659		0.203836	0.407221	0.413471	0.714607	0.362335	0.307215	0.243875	0.187972	0.258419	0.226959	0.415291		0.304165	0.328682	0.340542		0.346487	0.221757	0.309458	0.176801	0.195541	0.209433	0.22024	0.211365		0.357835	0.273286		0.314341	0.425121	0.266559	0.300112	0.376702	0.235847
	PE 18:0/18:3	0.302781	0.303522	0.347678	0.375348	0.311043	0.413234	0.381768	0.315899	0.300316	0.328711	0.321648	0.389403	0.247892	0.193255				0.277632	0.312665	0.274983	0.289362	0.299182	0.333196	0.322077			0.511212	0.53197	0.522857	0.473532	0.547298	0.519421	0.267445	0.340694	0.34534	0.315125	0.254044		0.279135		0.37265	0.327907	0.366617		0.340174	0.345606		0.267706
	PE 18:1/18:2	1.16897	1.11937	1.31218	1.37749	1.04083	1.17853	1.12138	1.08716	1.15544	1.25327	1.04983	1.14875	1.88192	1.14037	1.45996	2.01474	1.65237	0.862187	1.72685	1.75292	1.23041	1.39646	1.45378	1.32125	1.57837	1.06734	1.98184	1.9831	1.72622	1.52213	1.54094	1.85501	1.26845	1.45909	1.75124	1.35113	4.44784	1.11301	4.84726	4.12804	4.23042	4.62458	4.73893	3.07463	5.80112	5.90446	3.84482	4.83339
	PE 16:0/20:4	0.209505	0.197945	0.222171	0.151617	0.235549	0.228029	0.210342	0.250783	0.234062	0.224827	0.252051	0.215918	0.294112			0.538259	0.518163		0.422494	0.34304	0.310306	0.287541	0.30665	0.279191			0.418324	0.379549	0.574645	0.396898	0.417314	0.459183	0.420393	0.304158	0.27292	0.355696	0.534652	0.232228	0.389484	0.467949	0.47921	0.437149	0.394944	0.391169	0.436143	0.420276	0.463956	0.379648
	PE 18:1/18:3	0.457446	0.457756	0.439677	0.506039	0.367583	0.457916	0.497729	0.436186	0.486402	0.590801	0.50287	0.547243	0.183579	0.178377	0.17423	0.410616	0.284781	0.412775	0.387785	0.314382	0.237144	0.292857	0.285631	0.289967	0.355398		0.396814	0.362511	0.495303	0.383834	0.401416	0.441487	0.278554	0.283122	0.220627	0.319684	0.855419	0.338343	0.744338	0.719037	0.694854	0.764843	0.713927	0.416974	0.864628	0.769135	0.659334	0.70033
	PE 18:2/18:2	0.101862	0.0660263	0.0760684	0.0804634	0.122492	0.0930724	0.0726232	0.0980498	0.086298	0.0842636	0.126567	0.0958492	0.165444	0.102815	0.167245	0.269304	0.266287	0.127068	0.228444	0.258089	0.223145	0.19	0.251382	0.198449	0.269271	0.166865	0.357467	0.367919	0.323748	0.35207	0.299164	0.347666	0.241051	0.279489	0.315791	0.355479	0.609511	0.157306	0.468303	0.582056	0.600012	0.528638	0.580437	0.309286	0.464602	0.462236	0.290904	0.395931
	PE 16:0/20:5	0.23011	0.248239	0.233103	0.251174	0.335089	0.305976	0.260147	0.278352	0.321149	0.371996	0.411937	0.286619	0.265335		0.324566		0.447028		0.467417	0.38024	0.508109	0.628219	0.707962	0.57918			0.543329	0.612948	0.60231	0.472163	0.587738	0.615737	0.583744	0.686062	0.552548	0.549322	0.451506		0.355276	0.448916	0.44211	0.495502	0.448503		0.570901	0.589617	0.59284	0.51302
	PE 17:0/20:1	0.87802	0.881284	0.844706	1.00434	0.847156	0.786835	0.93781	0.811801	0.779707	0.85201	0.738109	0.994859	0.388965	0.31853	0.372432	0.516425	0.447774	0.0966484	0.370366	0.357959	0.262737	0.273643	0.252123	0.279836	0.29427	0.195485	0.197567	0.188177	0.200029	0.157941	0.161102	0.243125	0.310593	0.27482	0.244189	0.305136	0.415338	0.0662084	0.299609	0.410372	0.469634	0.327586	0.476586	0.322808	0.296101	0.313868	0.282299	0.294357
	PE 18:0/19:1	0.626974	0.689417	0.6204	0.714707	0.635157	0.65339	0.641384	0.600248	0.583692	0.543983	0.544148	0.571774	0.374104	0.478578	0.50131	0.546041	0.564147		0.421885	0.479354	0.404827	0.401664	0.431849	0.389706	0.659151	0.434184	0.491208	0.476555	0.558083	0.560206	0.526962	0.60817	0.437216	0.390426	0.475887	0.496969			0.194544	0.376969	0.423557		0.302103	0.399633	0.236092	0.251393	0.298506	0.257892
	PE 18:1/19:0	1.66496	2.09108	1.72796	2.04533	1.64575	1.68093	1.98763	1.61167	1.79957	1.81691	1.42278	1.92807	0.722429	0.63052	0.886547	0.812889	0.689303	0.882765	0.767933	0.779304	0.504155	0.493062	0.538507	0.559798	0.752735	0.591989	0.638796	0.577045	0.579791	0.588667	0.557495	0.601804	0.542106	0.578428	0.602938	0.629577	0.784726	0.492601	0.686866	0.706213	0.709241	0.664506	0.561757	0.659591	0.56751	0.562281	0.520043	0.501396
	PE 17:1/20:1	0.547123	0.408847	0.430239	0.390511	0.507084	0.466707	0.389501	0.418858	0.356772	0.356993	0.331832	0.341415	0.483445	1.17751	0.711104	0.625561	0.551659		0.495878	0.490464	0.388638	0.373397	0.371661	0.351612	0.744114	0.993629	0.451877	0.416086	0.440925	0.459141	0.420058	0.419544	0.516687	0.482684	0.417285	0.50882	0.695709	1.12051	0.626781	0.632168	0.743831	0.766013	0.603652	1.06152	0.50884	0.445459	0.730539	0.579589
	PE 18:1/19:1	2.18857	2.26182	2.02074	2.31212	1.91501	2.21757	2.08561	2.03069	1.95896	1.97226	1.82742	2.03594	2.30591	4.36662	3.51487	2.76491	2.2877	4.93987	2.27562	1.91786	1.61434	1.42231	1.44465	1.47291	3.43962	4.89108	2.17455	2.11021	2.19732	1.84287	2.32281	2.20453	2.65224	1.97895	1.60118	1.93483	2.88248	5.45576	3.33391	2.99775	3.06997	3.28923	2.95948	3.91132	2.39091	2.17696	3.45707	2.94052
	PE 17:0/20:3	0.928582	0.986303	1.09615	1.14174	1.01968	1.03032	1.16509	0.996725	1.02994	0.997451	1.03716	1.18805	0.631582	0.404447	0.569955	0.560813	0.610169	0.743959	0.530571	0.633211	0.408704	0.449878	0.527548	0.462254		0.405936	0.836234	0.801913	0.629677	0.691187	0.655998	0.665565	0.599064	0.504429	0.538648	0.505165	0.782261	0.31869	0.699058	0.637847	0.935595	0.923913	0.833506	0.762232	0.723477	0.717577	0.516335	0.682992
	PE 17:1/20:2	0.316386	0.225118	0.298554	0.242143	0.35508	0.261601	0.21184	0.265605	0.302442	0.267704	0.303086	0.214486	0.709343	0.554944		0.688551	0.717777		0.63385	0.605423	0.590426	0.555248	0.629136	0.631263	0.677244	0.536311	0.696793	0.746665	0.575937	0.682743	0.534759	0.648896	1.11248	1.04739	1.13385	1.12641	1.29436	0.527657	1.11371	1.32174	1.33828	1.04946	1.2302	0.910898	1.41122	1.46685	1.00534	1.26712
	PE 18:2/19:1	0.293289	0.248748	0.282844	0.243497	0.245635	0.243442	0.22035	0.198888	0.234072	0.257137	0.226885	0.231229	0.410837		0.369635	0.724099	0.572174		0.591366	0.4863	0.352839	0.427979	0.619505	0.444703	0.611992		0.497854	0.587577	0.729016	0.490672	0.347782	0.565008	0.582183	0.607944	0.527427	0.878149	0.913099	0.304242	0.809651	1.05051	1.30444	0.869631	1.16491	0.717134	0.968288	0.991	0.734986	0.812403
	PE 17:0/20:4	0.75503	0.994015	0.887449	1.04652	0.83444	0.969256	0.981429	0.812471	0.919885	0.916647	1.03354	0.984259	0.596	0.202039	0.405699	0.526592	0.59864	0.328812	0.565666	0.581888	0.397005	0.394764	0.448669	0.42035	0.483255		0.721891	0.696807	0.570832	0.550245	0.540137	0.63808	0.383657	0.560743	0.455667	0.506727	0.842367		0.818394	0.866724	0.852422	0.902232	0.973806	0.70908	0.855881	0.83932	0.617602	0.832179
	PE 17:1/20:3	0.725493	0.575353	0.704969	0.572489	0.874076	0.728823	0.624713	0.72202	0.503138	0.476676	0.537434	0.474722	1.26621	1.31557	1.11492	1.20986	1.50056	1.32614	1.41589	1.58798	0.726523	0.730819	0.769135	0.745016	1.75299	1.35583	2.13708	2.03413	1.35533	1.62579	1.38419	1.55965	1.0542	1.09453	1.07659	1.06522	1.28519	1.03261	1.23015	1.34052	1.44679	1.08829	1.26303	1.15491	0.911788	0.957242	0.787194	0.822295
	PE 17:0/20:5	1.14889	1.53535	1.17964	1.42069	1.19004	1.39807	1.43255	1.16182	1.4592	1.3965	1.31362	1.42283	0.779504	0.329109	0.541954	0.714531	0.857028	0.658516	0.845884	0.762839	0.743728	0.873183	0.852255	0.81089	0.637355	0.497351	1.08049	1.12228	0.874469	0.857387	0.910561	0.816667	0.986126	1.03457	0.89104	0.949062	1.60285	0.42278	1.29911	1.42794	1.84827	1.49649	1.62302	1.13696	1.91282	1.88392	1.37686	1.78848
	PE 17:1/20:4	0.641459	0.550126	0.66873	0.502322	0.705547	0.651834	0.467856	0.631143	0.498958	0.447789	0.484403	0.390187	1.00029		0.784529	1.05496	1.12104	0.327484	1.02098	1.16152	0.802019	0.769411	0.833017	0.732456	1.02657	0.598614	1.66958	1.57115	1.25727	1.36401	1.176	1.22637	0.935045	1.07266	1.01058	0.887769	1.13592	0.201048	0.822262	0.942344	0.89641	0.706863	0.90938	0.661107	0.527422	0.605649	0.419087	0.514496
	PE 17:1/20:5	0.545275	0.374978	0.512182	0.41583	0.57483	0.487787	0.353205	0.480524	0.368113	0.344461	0.388995	0.323982	0.82752		0.682636	0.899025	1.05254	0.733582	0.948282	1.05726	0.681444	0.682419	0.793601	0.72493	0.869703	0.650653	1.33922	1.31326	1.12365	1.18015	1.03706	1.15674	0.666623	0.841685	0.872305	0.812653	0.765431		0.595887	0.910387	0.689817	0.667097	0.736926	0.527884	0.452523	0.4861	0.336489	0.423802
	PE 18:0/20:1	0.576172	0.547271	0.499378	0.575478	0.502592	0.482776	0.482914	0.485539	0.38348	0.408673	0.348887	0.394352	0.284929	0.268794	0.256616	0.408404	0.303592	0.369325	0.262964	0.238492	0.148104	0.145071	0.193511	0.163947	0.256829	0.208281	0.160947	0.133915	0.228314	0.127869	0.143694	0.259979	0.208537	0.140067	0.129237	0.150129	0.159709	0.160724	0.183225	0.0804376	0.165882	0.245436	0.222666	0.182898	0.142751	0.133179		0.12272
	PE 18:1/20:0	1.00761	0.874791	0.900211	0.899059	0.92181	0.861357	0.893934	0.805757	0.660334	0.697124	0.617359	0.752264	0.654615				1.08151		0.807875	0.955984	0.479528	0.538263	0.525358	0.500437					1.15264	0.915784	0.917509	1.04372		0.683612	0.670565	0.792881	0.583115								0.490156	0.492675
	PE 18:1/20:1	0.852973	0.887175	0.813011	0.956034	0.795643	0.872066	0.874481	0.746342	0.763245	0.787439	0.708902	0.862984	0.685348		0.817542	0.895648	0.851525	0.850818	0.788128	0.679434	0.560609	0.674866	0.642656	0.618818	0.899425	1.01455	0.812819	0.735171	0.697055	0.623195	0.761594	0.675408	0.728963	0.84207	0.589135	0.798576	1.46304	0.979122	1.62252	1.56404	1.54127	1.36211	1.58031	1.36018	1.28221	1.20337	1.22742	1.11616
	PE 19:1/19:1	0.226476	0.181296	0.185339	0.257729	0.15571	0.194905	0.198204	0.160189	0.195441	0.216674	0.133536	0.21324	0.173338	0.512104	0.399424	0.269924	0.18631	0.800139	0.181858	0.139675	0.150033	0.112392	0.15341	0.127863	0.352803	0.475457	0.134256	0.132882	0.170203	0.128423	0.198567	0.174372	0.276226	0.193553	0.164456	0.18636	0.232914	0.537974	0.240447	0.347589	0.22788	0.296851	0.318017	0.436338	0.18159	0.151471	0.381753	0.308137
	PE 18:0/20:3	0.646094	0.670598	0.7834	0.694287	0.668555	0.658666	0.669258	0.653621	0.491632	0.490061	0.50848	0.568378	0.621948			0.691795	0.522878			0.519394	0.262764	0.338655	0.288521	0.271905	0.636945		0.65527	0.64507	0.511595	0.553653	0.511931	0.503279	0.474909	0.486523	0.350413	0.437582		0.33711	0.361013	0.424323	0.412728		0.454918		0.340927	0.349706	0.36538	0.324348
	PE 18:1/20:2	0.46758	0.545396	0.587893	0.533009	0.542649	0.580187	0.571376	0.522163	0.549991	0.451186	0.516489	0.549231	0.57806	0.600763	0.398542	0.707072	0.505021		0.485381	0.492175	0.488058	0.443798	0.498948	0.435371	0.497755		0.515887	0.439765		0.437729	0.420008	0.48509	0.628185	0.496514	0.524924	0.505117	1.17322	0.588228	1.18779	1.24746	1.26278	1.15761	1.19662	1.00137	1.30886	1.31356	1.00107	1.181
	PE 18:0/20:4	0.710734	0.729747	0.777104	0.721506	0.685456	0.734012	0.691311	0.691317	0.521078	0.540183	0.516187	0.566943	0.638783			0.862873	0.666327		0.577245	0.585509	0.345224	0.395856	0.360892	0.393508	0.784399		0.933523	0.909711	0.762053	0.62702	0.678603	0.705648	0.627439	0.588832	0.474548	0.607209	0.720607		0.578094	0.712608	0.684083	0.669739	0.529205		0.481124	0.52019	0.39369	0.432724
	PE 18:1/20:3	1.36732	1.4746	1.75594	1.39202	1.65755	1.62927	1.50414	1.607	1.51478	1.41067	1.33707	1.64706	1.17856	0.920692		1.17637	1.18635		1.03072	1.3414	1.28165	0.816692	1.18129	1.13639		0.851783	1.34631	1.10278	1.07339	1.22449	1.25029	1.15205	1.03529	1.00507	1.24405	0.869383	1.48333	0.871093	1.4432	1.20265	1.41914	1.34565	1.3046	1.11494	1.11104	1.14213	0.983333	1.08694
	PE 18:0/20:5	1.4562	1.38637	1.36485	1.52029	1.5044	1.70574	1.33294	1.38361	1.17838	1.07776	1.10993	1.16261	1.21826	0.945348	1.04761	1.49413	1.42974	0.909789	1.38753	1.48145	1.174	1.20882	1.33454	1.24245	1.62562	1.13319	2.23501	2.17926	1.79946	1.51695	1.74718	1.55458	1.45999	1.64825	1.45143	1.43472	1.41214		1.12533	1.41675	1.15619	1.24457	1.21057	1.00059	1.06862	1.2137	0.960794	0.979031
	PE 18:1/20:4	0.891678	0.828764	1.0075	0.818934	0.974742	0.989937	0.744097	0.901864	0.894646	0.849401	0.879302	0.830789	1.09585		0.805504	1.02442	0.949101	0.433031	0.947689	1.32559	1.24724	0.839677	1.3075	1.08047	0.974672		1.42921	1.28492	1.1733	1.18995	1.24528	1.33872	0.998323	1.1929	1.30065	0.91665	1.83149		1.74377	1.49969	1.51848	1.25276	1.5057	1.02071	1.28697	1.26783	1.017	1.17334
	PE 18:2/20:3	0.262293	0.230907	0.29892	0.267964	0.321522	0.282664	0.241611	0.23827	0.216121	0.249175	0.225916	0.250676	0.299874	0.241029	0.307554	0.489929	0.248813		0.282902	0.313775	0.319613	0.219965	0.360703	0.259496	0.252577	0.203684	0.44004	0.358599	0.416275	0.34715	0.279265	0.365609	0.397477	0.336321	0.385859	0.322724	0.598919	0.217379	0.425622	0.51963	0.425764	0.500835	0.477023	0.244081	0.42631	0.412332	0.404086	0.350571
	PE 18:1/20:5	0.663139	0.824584	0.759895	0.913371	0.719689	0.771524	0.745987	0.655352	0.772702	0.760726	0.8734	0.813564	0.665257		0.641047	0.725591	0.920193	0.34668	1.02581	0.85888	0.770939	0.814769	0.959046	0.8197	0.873946	0.708811	1.06377	1.12306	1.19984	0.92709	1.06408	0.985481	0.872422	0.89391	0.843182	0.795157	1.90981	0.563795	1.72617	1.88862	2.20078	2.06087	2.18717	1.26469	2.21152	2.32518	1.59332	1.85943
	PE 18:2/20:4	0.184346	0.149138	0.202912	0.151333	0.194306	0.189209	0.146756	0.183285	0.167821	0.210012	0.189377	0.174134	0.269815	0.141564		0.475071	0.334253	0.637357	0.315758	0.372434	0.27413	0.19534	0.29115	0.289896	0.316587		0.390482	0.313662	0.461484	0.328994	0.296502	0.455738		0.322436	0.33528	0.310693	0.484869	0.0642887	0.420411	0.411456	0.501781	0.470668	0.421173	0.133903	0.355594	0.356297	0.257125	0.287533
	PE 18:2/20:5	0.132129	0.148714	0.149355	0.141133	0.196586	0.18923	0.130353	0.15139	0.149902	0.172118	0.18485	0.181112	0.203449	0.283819	0.141653	0.324467	0.39429	0.431543	0.43635	0.415222	0.318094	0.262955	0.363826	0.309048	0.331628	0.207901	0.448495	0.387879	0.444263	0.464043	0.347946	0.519096	0.474307	0.504204	0.429332	0.49161	0.626361	0.165873	0.400525	0.788233	0.631131	0.541944	0.487456	0.424804	0.421255	0.452499	0.262722	0.335419
	PE 19:1/20:5	0.226516	0.240995	0.178639	0.207612	0.224541	0.232853	0.176805	0.161063	0.179431	0.219784	0.213303	0.186334	0.190085	0.274113	0.223612		0.628837		0.412001	0.457895	0.227619	0.205904	0.326552	0.264408	0.334928	0.243106	0.328101	0.329478	0.471416	0.336393	0.267912	0.610243	0.394699	0.505334	0.388885	0.568283	0.581402		0.303185	0.782714	0.544767	0.624569	0.513139	0.302325	0.313945	0.279508	0.305246	0.267714
	PE 20:3/20:3	0.143531	0.100313	0.0942567	0.0643901	0.0864095	0.101469	0.0766096	0.0884288	0.0689835	0.0760765	0.063236	0.0719872	0.104005		0.0590719	0.229742	0.0854874	0.305255	0.104613	0.0926381	0.0617866	0.0336981	0.068407	0.0458597			0.166769		0.117043	0.09142	0.0705419	0.15887	0.0921158				0.173454		0.157415	0.324261		0.115893	0.17845		0.0940314	0.0815237
	PE 20:3/20:5	0.158101	0.167214	0.141976	0.149306	0.173781	0.164193	0.143763	0.120572	0.122606	0.146309	0.131492	0.129989	0.0720738		0.03645	0.0471846	0.288669	0.133023	0.207255	0.213005	0.113479	0.0894397	0.146753	0.104612		0.110045		0.179893	0.237076	0.13685	0.157026	0.182819	0.259912	0.220959		0.190544	0.375443		0.252233	0.404827	0.376429	0.375144	0.356456		0.207688	0.219665	0.23678	0.239322
	PE 20:4/20:4	0.0542361	0.0466206	0.0509369	0.0504011	0.0898774	0.0961034	0.0407813	0.052201	0.0425355	0.0514731	0.0422488	0.0458719	0.0639994		0.033088	0.0534967	0.102988		0.0800402	0.0825739	0.0539312	0.0412141	0.0912873	0.0529569	0.119261		0.118668	0.0820775	0.0694754	0.0973137	0.0862323	0.148449		0.0923155	0.094785	0.0937765	0.171136	0.0646116	0.073254	0.181523	0.0677541	0.0486303	0.0675018	0.0799144	0.044675	0.0517795		0.0553537
	PE 20:4/20:5		0.10337	0.0983616	0.105824	0.136411	0.133699	0.0998909	0.0802543	0.0854187	0.117766	0.0799119	0.0888331	0.111789				0.29471	0.0366458	0.160824	0.220777	0.128338	0.0760152	0.13825	0.101096	0.19943		0.222162	0.143358	0.182082	0.155909	0.165392	0.295571	0.31892	0.206164	0.192915	0.186703	0.2562	0.100361	0.192206	0.43476		0.333582	0.228897	0.177382	0.111014	0.139311	0.107497	0.126046
	PE 20:5/20:5	0.0413329	0.0426174	0.0375277	0.0400758	0.064545	0.0547594	0.0245031	0.042987	0.0462123	0.0500876	0.0523275	0.0348158	0.0512764	0.0470017		0.0632201	0.156548	0.146746	0.105466	0.129969	0.0959131	0.0593227	0.0929816	0.0964773	0.0737184	0.095388	0.158884	0.0779813	0.124574	0.105528	0.0961405	0.143377	0.140046	0.127462	0.119345	0.185888	0.127482	0.0388919	0.0987948	0.145222	0.162315	0.165363	0.139845		0.0561767	0.0704633		0.0365416
[truncated: 12 more columns]

## Sheet: PE_FA_Composition
		p1p2												p2												N2												mn
	Composition (mol%)	15°C				20°C				25°C				15°C				20°C				25°C				15°C				20°C				25°C				15°C				20°C				25°C
	FA 15:0	3.48092	5.02924	3.63559	4.56811	3.52	3.92602	4.97749	3.90456	5.06657	5.19321	5.29211	4.89021	2.71319	1.5837	2.40713	2.77003	3.10741	1.43699	2.81178	2.8776	4.14073	4.7602	4.42673	4.58615	0.976346	0.931996	0.954415	1.04048	1.71328	1.41574	1.56413	1.58714	3.24256	3.21758	2.91991	3.0652	2.25886	1.08041	1.61265	1.96555	2.49829	2.1583	2.45288	1.81774	2.79342	2.87132	2.00977	3.1631
	FA 16:0	4.59004	3.55786	3.76004	3.36001	3.95164	3.53133	3.89268	4.2865	4.16561	4.07377	4.99289	4.00396	5.99178	11.412	9.10737	7.14785	5.71706	15.0294	5.73487	4.71054	6.18545	6.24528	6.06068	5.86866	7.18715	10.6948	3.21049	3.0613	4.29825	3.22925	4.29079	3.61138	5.33897	3.44268	2.86942	3.65299	3.69672	13.2538	4.04842	4.2163	3.63541	5.18197	3.75467	8.74567	3.68252	3.45393	8.29286	5.75523
	FA 16:1	1.28826	0.797241	0.820349	0.738704	0.80562	0.852852	0.837962	0.879206	0.764909	0.792478	0.738284	0.844597	1.42389	3.15876	2.2299	1.38679	1.33062	3.71994	0.82954	0.664227	1.00002	0.973885	0.874267	0.900375	2.41376	2.98395	1.27073	1.57622	2.27579	1.22622	2.0243	2.02625	1.09897	1.06727	0.970619	1.05878	0.657629	3.39507	1.26967	0.643132	0.684345	1.3667	0.859085	2.45181	0.705775	0.731356	2.51053	1.38762
	FA 17:0	11.0951	12.7935	11.7336	13.1486	11.1751	12.3595	13.3703	11.8446	13.3756	13.9616	13.4441	14.5015	6.70843	4.38881	5.67099	6.76548	6.20671	3.33053	5.80571	6.01091	5.67752	5.99725	6.31163	5.89945	2.43794	2.20586	2.69211	2.43082	2.69443	2.44926	2.7507	2.48263	4.29355	4.24537	4.20201	4.20712	5.79407	2.54186	5.27814	5.91692	7.06975	6.33356	6.73766	4.99201	7.20963	7.38445	5.76783	7.00109
	FA 17:1	7.14804	4.89344	5.63051	5.69281	4.93174	5.54878	6.12356	5.75934	5.80053	5.68008	4.62394	6.0601	8.59893	24.7025	16.1325	9.69753	7.11996	29.6786	6.8956	5.67322	7.30271	5.59401	5.42286	5.5854	17.349	25.5865	8.15456	7.90039	8.9988	8.56787	10.8829	8.21912	10.4527	6.8151	6.33904	6.76629	7.71344	31.2734	9.90064	7.45525	8.74587	10.0206	7.52528	18.7184	5.79223	5.04183	15.8879	10.7262
	FA 18:0	7.5119	7.52539	8.02403	7.87003	7.97733	8.20944	7.59341	7.75466	6.46816	6.62136	6.50396	6.95593	5.47169	3.41231	4.21905	5.56559	4.96747	2.8229	5.3312	5.25063	4.63439	4.67931	4.80868	4.78172	4.50385	3.07935	5.23293	5.31469	5.63281	4.96608	5.21469	5.20204	4.08655	4.81869	4.3603	4.71139	3.45266	1.56983	3.22354	4.29375	3.79773	3.59669	3.36073	2.43391	3.40405	3.66026	2.94926	3.04635
	FA 18:1	45.5464	47.1442	47.0519	45.5788	48.4711	46.727	45.7917	47.771	46.8589	46.3088	46.6914	45.704	45.8408	34.1862	41.5232	41.7195	47.7151	24.2705	50.2112	51.4674	50.8564	51.213	50.3257	51.7267	40.1187	35.2841	47.8831	48.2617	49.3479	53.0086	48.9235	50.7987	47.0848	52.1607	54.046	52.0372	44.1418	29.528	45.0775	43.7631	41.9909	40.7372	42.4703	36.4326	44.2978	44.7363	36.4933	39.5818
	FA 18:2	6.28451	5.61507	6.60086	5.74721	6.00323	5.48483	5.20754	5.61623	5.96519	5.85446	6.43929	5.43275	10.2156	4.47533	7.21716	10.4115	9.17335	2.74746	9.14102	9.29487	9.89999	10.3858	10.9355	10.5094	9.67829	5.45386	13.386	13.7637	10.1923	10.857	9.7913	10.6226	10.2909	10.9826	11.8432	11.3684	14.4935	3.47442	13.3055	13.321	13.5026	13.7136	14.4797	8.72368	17.1146	17.3642	11.316	14.1056
	FA 18:3	0.30083	0.339945	0.295579	0.402481	0.373834	0.429377	0.416971	0.397556	0.414894	0.39218	0.447748	0.429463	0.320168	0.198185	0.148851	0.272984	0.333839	0.3226	0.330601	0.40694	0.506283	0.633781	0.591077	0.615829	0.291909		0.75346	0.815514	0.853676	0.792131	0.906949	0.803357	0.497783	0.43885	0.490815	0.551773	0.836466	0.165043	0.731077	0.376191	0.877428	0.712474	0.833952	0.201545	0.969235	0.951551	0.556045	0.795417
	FA 19:0	0.355161	0.431816	0.4097	0.490813	0.38805	0.399492	0.41107	0.366888	0.391861	0.389866	0.28929	0.423298	0.149197	0.1701	0.195403	0.249618	0.148715	0.608735	0.1545	0.142032	0.0968596	0.106727	0.103523	0.0929139	0.151169	0.200877	0.126706	0.104167	0.139888	0.0982724	0.11722	0.145615	0.140766	0.113216	0.11386	0.104715	0.181363	0.115576	0.189218	0.145468	0.23407	0.245269	0.136808	0.162951	0.12448	0.132456	0.12708	0.120418
	FA 19:1	3.48431	3.02223	2.93934	3.47082	2.77771	3.10453	3.07554	2.99534	3.10383	2.97444	2.65094	3.10984	3.03151	8.53023	5.58256	3.82851	2.59722	10.9152	2.5507	2.35563	2.7371	2.1912	2.15139	2.26269	6.01663	8.73219	2.63788	2.53812	2.78644	2.52973	3.31352	2.65588	3.98656	2.57146	2.53517	2.61756	3.21312	10.4631	3.86047	3.64991	3.62047	3.92833	3.88771	6.73529	2.92985	2.55099	6.13311	4.64231
	FA 20:0	0.185587	0.182112	0.149038	0.182563	0.197325	0.186247	0.179161	0.159566	0.136466	0.137851	0.129557	0.158266	0.121206				0.163391		0.151754	0.132114	0.0915393	0.0937083	0.0960761	0.0716217					0.194052	0.175534	0.134967	0.202474		0.12275	0.136817	0.167528	0.113234								0.0714303	0.0689159
	FA 20:1	1.76346	1.61141	1.6318	1.68168	1.64086	1.49699	1.49444	1.44647	1.22014	1.27729	1.19281	1.39481	0.940685	0.71215	0.843004	1.37045	1.04868	0.647033	0.948824	0.954231	0.540563	0.592139	0.660772	0.600678	0.616307	0.548671	0.70089	0.638193	0.665272	0.590893	0.496075	0.702995	0.694638	0.710826	0.617992	0.712002	1.22757	0.313186	1.03878	1.14613	1.15133	1.22071	1.17369	0.840661	0.810708	0.82709	0.62418	0.681821
	FA 20:2	0.340355	0.27139	0.364051	0.298145	0.381961	0.324347	0.252221	0.296112	0.336066	0.286749	0.330511	0.237666	0.877539	0.621006	0.142643	0.903051	0.798964		0.713434	0.715322	0.595782	0.602243	0.65841	0.650064	0.753858	0.334584	0.791845	0.841723	0.469114	0.695639	0.56027	0.700327	1.22592	1.09257	1.19861	1.18298	1.79742	0.635719	1.63876	1.95576	1.77686	1.45119	1.70551	1.35311	1.85717	1.92714	1.2805	1.68224
	FA 20:3	2.20309	1.96898	2.2884	2.15311	2.43678	2.1901	2.06597	2.1376	1.72276	1.72488	1.78699	1.76671	2.6002	1.20303	1.50754	2.87145	2.90605	1.50653	2.41641	3.05707	1.41924	1.57994	1.697	1.50216	2.01977	1.67757	3.98784	3.76856	2.77314	2.89819	2.80864	3.02743	2.19738	2.0296	1.94913	1.98933	3.01193	1.05207	2.77594	3.28425	3.3183	2.61444	3.29117	2.13988	2.50626	2.49567	1.81046	2.16772
	FA 20:4	2.00793	2.19843	2.25342	2.10917	2.18225	2.36805	2.01589	2.06086	1.88034	1.93502	2.04877	1.8355	2.33702	0.252805	1.18279	2.43727	2.72098	0.960828	2.46826	2.66935	1.65365	1.70305	1.77944	1.62461	2.61774	0.512269	3.6978	3.48007	2.99891	2.88798	2.63934	3.00291	1.93971	2.39207	2.08291	2.14664	3.31189	0.353677	2.82543	3.1097	2.98072	2.60451	3.10503	1.86244	2.28497	2.31129	1.66642	2.09152
	FA 20:5	2.41416	2.61779	2.4118	2.50702	2.78546	2.86112	2.2941	2.3235	2.32817	2.39594	2.39745	2.25144	2.6582	0.992898	1.88998	2.60239	3.94449	2.00277	3.50459	3.61789	2.66176	2.64845	3.09623	2.72155	2.86765	1.77342	4.51926	4.46432	3.96597	3.61161	3.58074	4.20922	3.42817	3.7787	3.32421	3.66006	4.09827	0.784858	3.22421	4.75756	4.11587	4.11446	4.22579	2.38834	3.44584	3.49126	2.57477	3.05152
	SFA	27.2187	29.5199	27.712	29.6201	27.2095	28.6121	30.4241	28.3168	29.6043	30.3776	30.6519	30.9331	21.1555	20.967	21.5999	22.4986	20.3108	23.2285	19.9898	19.1238	20.8265	21.8825	21.8073	21.3005	15.2565	17.1129	12.2166	11.9515	14.6727	12.3341	14.0725	13.2313	17.1024	15.9603	14.6023	15.9089	15.4969	18.5614	14.352	16.538	17.2352	17.5158	16.4427	18.1523	17.2855	17.5713	19.1468	19.0862
	MUFA	59.2304	57.4685	58.0739	57.1628	58.627	57.7301	57.3232	58.8513	57.7483	57.0331	55.8973	57.1133	59.8358	71.2898	66.3111	58.0027	59.8116	69.2313	61.4359	61.1147	62.4368	60.5643	59.435	61.0758	66.5143	73.1354	60.6472	60.9147	64.0742	65.9233	65.6403	64.4029	63.3177	63.3253	64.5088	63.1918	56.9536	74.9728	61.1471	56.6575	56.193	57.2735	55.9161	65.1787	54.5364	53.8875	61.649	57.0198
	PUFA	13.5509	13.0116	14.2141	13.2171	14.1635	13.6578	12.2527	12.8319	12.6474	12.5892	13.4508	11.9535	19.0087	7.74325	12.089	19.4987	19.8777	7.54019	18.5743	19.7614	16.7367	17.5533	18.7577	17.6237	18.2292	9.7517	27.1362	27.1339	21.2531	21.7425	20.2872	22.3658	19.5799	20.7144	20.8889	20.8992	27.5495	6.46579	24.501	26.8045	26.5718	25.2107	27.6412	16.669	28.1781	28.5411	19.2042	23.894
[truncated: 12 more columns]
